# Supplementary material for: Overcoming Nitrogen Reduction to Ammonia Detection Challenges: The Case for Leapfrogging to Gas Diffusion Electrode Platforms
Source: PubMed Central journal article supplement (PMC9127788; doi:10.1021/acscatal.2c00888), 2022-04-28
Supplement: cs2c00888_si_001.pdf [file cs2c00888_si_001.pdf]

**Supporting Information: Overcoming nitrogen reduction to ammonia detection challenges: The case for leapfrogging to gas diffusion electrode platforms**

Martin Kolen<sup>a\*</sup>, Davide Ripepi<sup>a</sup>, Wilson A. Smith<sup>a</sup>, Thomas Burdyny<sup>a</sup>, Fokko M. Mulder<sup>a\*</sup>

<sup>a</sup> Materials for Energy Conversion and Storage (MECS), Department of Chemical Engineering, Faculty of Applied Sciences, Delft University of Technology, van der Maasweg 9, 2629 HZ Delft, The Netherlands

**Corresponding Author:** [m.kolen@tudelft.nl](mailto:m.kolen@tudelft.nl); [f.m.mulder@tudelft.nl](mailto:f.m.mulder@tudelft.nl)

## Miniaturized alkaline impurity trap

The removal of  $\text{NH}_3$  and  $\text{NO}_x$  contamination from the gas feed of the cell is crucial to avoid false positives while testing catalysts for NRR. Purifiers to achieve this typically consist of an inner and an outer tube. The inner tube is immersed into the outer tube which is filled with an oxidizing solution that traps the  $\text{NH}_3/\text{NO}_x$ . During operation, gas is bubbled into the oxidizing solution through the inner tube. The gas exits the outer tube through its headspace.

Typically, both outer tube and inner tube are made of glass, because glass is very inert and easy to reshape. However, the smallest commercially available impurity traps of this design have several mL of headspace volume which would make them very expensive to flush during a  $^{15}\text{N}_2$  experiment. Therefore, we propose to use an impurity trap made from inert polymers instead, as shown in Figure S1. The working principle of the design is identical to that of glass impurity traps but the inner and outer tube are made of inert polymer tubing. The headspace of the 1/32" outer diameter (OD) inner tubing and the tee is negligible so that the total headspace of the purifier can be estimated from the headspace of the 1/4" outer diameter (OD) outer tube. In our experience approximately 1 cm of headspace in the outer tube is sufficient to prevent liquid from entering the gas channel. With an inner diameter (ID) of 5.6 mm the headspace of the outer tube is approximately 250  $\mu\text{L}$ . This low headspace makes it ideal for cheap  $^{15}\text{N}_2$  experiments in GDE cell. Additionally, it is comprised of standard connectors for easy, leak-tight, contamination-free connections. Unlike with glass impurity traps, it is possible to easily adjust the length of the outer tube depending on the required removal efficiency. The trap only consists of readily available, off-the-shelf parts which should improve standardization of this critical component.

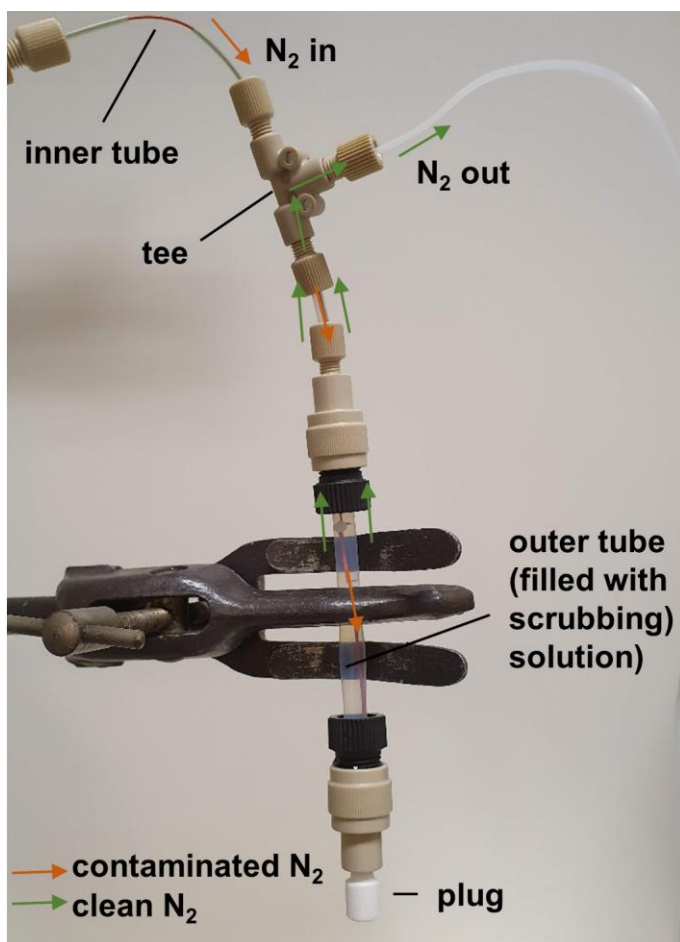

Figure S1 Photograph of a miniaturized purifier to clean  $\text{NH}_3/\text{NO}_x$  contaminated gas streams with minimal additional headspace.

Table S1. Order list for an impurity trap with low headspace volume.

| Part # | Name                                                                          | Quantity | Supplier    | Price (\$) |
|--------|-------------------------------------------------------------------------------|----------|-------------|------------|
| 1648   | Tefzel™ (ETFE) Tubing Natural 1/8" OD x .093" ID x 5ft                        | 1        | IDEX Health | 33.75      |
| U-665  | Adapter Assembly 1/2-20 Female x 1/4-28 Female                                | 2        | IDEX Health | 37.50      |
| P-713  | PEEK Low Pressure Tee Assembly 1/8" PEEK .050 thru hole                       | 1        | IDEX Health | 38.63      |
| F-247  | NanoTight™ Sleeve Green 1/16" OD x .033" ID x 1.6"                            | 4        | IDEX Health | 2.84       |
| 1569   | PEEK Tubing Orange 1/32" OD x .020" ID x 5ft                                  | 1        | IDEX Health | 56.93      |
| P-703  | Union Assembly PEEK .050 thru hole, for 1/8" OD                               | 2        | IDEX Health | 24.98      |
| P-249  | Super Flangeless™ One-Piece Fitting, 1/4-28 Flat-Bottom, for 1/16" OD         | 6        | IDEX Health | 11.02      |
| P-311  | Plug Tefzel™ (ETFE) - 1/4-28                                                  | 1        | IDEX Health | 2.49       |
| 20533  | PTFE tubing tubing L x OD x ID 25 ft x 1/4 in. (6.35 mm) x 0.228 in. (5.8 mm) | 1        | Merck Sigma | 88.8       |

## Calculation: nitrogen reduction reaction mass-transport limiting current in H-cell

We estimate the mass transport limiting current of the nitrogen reduction reaction  $j_{lim,NRR}$  from the mass-transport limiting current of the CO<sub>2</sub> reduction reaction to CO  $j_{lim,CO2RR}$  according to:

$$j_{lim,NRR} \approx j_{lim,CO2RR} \frac{S_{N_2} D_{N_2} z_{NRR}}{S_{CO_2} D_{CO_2} z_{CO2RR}} \quad (1)$$
$$= 10 \frac{mA}{cm^2} \frac{1.27 \times 10^{-5} \times 1.77 \times 10^{-5} \frac{cm^2}{s} \times 6}{7 \times 10^{-4} \times 1.67 \times 10^{-5} \frac{cm^2}{s} \times 2}$$
$$= 0.6 \frac{mA}{cm^2}$$

, where  $S_i$ ,  $D_i$ , are the solubility and diffusion coefficient of nitrogen and carbon dioxide in water, respectively and  $z_{NRR}$ ,  $z_{CO2RR}$  are the number of electrons transferred in the electrochemical reduction of nitrogen to ammonia and of carbon dioxide to carbon monoxide per molecule of N<sub>2</sub>/CO<sub>2</sub>, respectively.<sup>1-5</sup>

## Calculation: accumulated NH<sub>3</sub> in the electrolyte

The concentration of NH<sub>3</sub> in the electrolyte was calculated according to:

$$c_{NH_3} = \frac{i_{NH_3} t}{z F V} \quad (2)$$

, where  $c_{NH_3}$  is the concentration of NH<sub>3</sub> after electrolysis,  $i_{NH_3}$  is the partial current density of NRR,  $t$  is the duration of the experiment,  $z$  is the number of electrons transferred per molecule of NH<sub>3</sub> produced,  $F$  is the Faraday Constant and  $V$  is the half-cell volume of the electrolyte, respectively.

## Mathematical modelling of influence of ECSA on ammonia production and faradaic efficiency

The specific activity (defined as the ECSA normalized current density)  $j_{ECSA}$  was calculated by assuming Butler-Volmer kinetics according to:

$$j_{ECSA} = j_0(e^{-\alpha f\eta} - e^{(1-\alpha)f\eta}) \quad (3)$$

, where  $j_0$  is the exchange current density,  $\alpha$  is the symmetry factor,  $f$  is the Faraday Constant  $F$  divided by the ideal gas constant  $R$  and the temperature  $T$  and  $\eta$  is the overpotential.<sup>6</sup> The current density normalized by geometric surface area  $j_{geometric}$  was calculated by multiplying  $j_{ECSA}$  with the roughness factor of the electrode.

The faradaic efficiency was modelled by assuming that a potential window exists where NRR is favorable over HER and that the faradaic efficiency (FE) of NRR within this potential window can be described by a quadratic function:

$$FE = a\eta^2 + b\eta + c \quad (4)$$

, where  $a, b, c$  are constant parameters.

The partial current density of NRR  $j_{NRR}$  was calculated by multiplying the faradaic efficiency with  $j_{geometric}$ . The partial current density of NRR including mass transport effects  $j_{mt,NRR}$  was calculated by replacing  $j_{NRR}$  with the mass transport limiting current  $j_{lim,NRR}$  wherever  $j_{NRR}$  would otherwise have been lower than  $j_{lim,NRR}$ :

$$j_{mt,NRR} = \max(j_{NRR}, j_{lim,NRR}) \quad (5)$$

## Literature summary of reported levels of NH<sub>3</sub>/NO<sub>x</sub> contamination

*Table S2. Literature summary of ammonia and nitrate contaminations observed in nitrogen reduction studies. \*To make reports more comparable, contaminations reported as absolute amounts in nmol or as concentrations in a gas stream were converted into concentrations in the electrolyte by assuming the following parameters: electrolyte volume 10 mL, catalyst area: 1 cm<sup>2</sup>, catalyst amount: 1 mg, gas flow rate: 30 mL/min duration of gas flow: 2h.*

| Contamination source                                     | NH <sub>3</sub> /NO <sub>x</sub> concentration | Reference |
|----------------------------------------------------------|------------------------------------------------|-----------|
| Human Breath                                             | 0.3-3 ppm NH <sub>3</sub> in gas               | 7         |
| Human Breath                                             | 0.28-1.4 ppm NH <sub>3</sub> in gas            | 8         |
| 0.05 M H <sub>2</sub> SO <sub>4</sub> open to air for 1h | 1.7 μM NH <sub>3</sub>                         | 9         |
| 0.05 M H <sub>2</sub> SO <sub>4</sub> sealed for 1h      | 0.6 μM NH <sub>3</sub>                         | 9         |
| DI water open to air for 400 min                         | 8.8 μM NH <sub>3</sub>                         | 10        |
| Nitrile gloves sonicated for 1h in DI water              | 155.1 μM NH <sub>3</sub>                       | 7         |
| Polypropylene sample storage container (initially)       | 0.3 - 49.8 μM NO <sub>x</sub>                  | 11        |
| Polypropylene sample storage container (after 10 days)   | 3.4 - 65.3 μM NO <sub>x</sub>                  | 11        |
| Cell, electrolyte, epoxy, electrodes                     | 18.9-21.5 μM NO <sub>x</sub>                   | 11        |
| N impurities in CoMo film                                | 10 μM NH <sub>3</sub>                          | 11        |

|                                                                                                                          |                                                                                                                                                                                          |    |
|--------------------------------------------------------------------------------------------------------------------------|------------------------------------------------------------------------------------------------------------------------------------------------------------------------------------------|----|
| Rubber septa                                                                                                             | 630 $\mu\text{M}$ $\text{NH}_3$ , 270 $\mu\text{M}$ $\text{NO}_x$                                                                                                                        | 12 |
| Ar                                                                                                                       | 1.3 ppb $\text{NO}_x$ in gas (0.02 $\mu\text{M}$ $\text{NO}_x$ )*                                                                                                                        | 11 |
| $\text{N}_2$                                                                                                             | 3.1 ppb $\text{NO}_x$ in gas (0.046 $\mu\text{M}$ $\text{NO}_x$ )*                                                                                                                       | 11 |
| Ar, $\text{N}_2$ , $^{15}\text{N}_2$                                                                                     | 200ppb $\text{N}_2\text{O}$ in gas (3 $\mu\text{M}$ $\text{NO}_x$ )*                                                                                                                     | 13 |
| $^{15}\text{N}_2$                                                                                                        | 0.024 - 420 ppm $^{15}\text{NO}_x$ in gas (0.36-6290 $\mu\text{M}$ $^{15}\text{NO}_x$ )*<br>0.014 - 1900 ppm $^{15}\text{NH}_3$ in gas (0.21 – 28454 $\mu\text{M}$ $^{15}\text{NH}_3$ )* | 14 |
| $\text{Bi}_2\text{O}_3$ , $\text{Al}_2\text{O}_3$ , $\text{Fe}_2\text{O}_3$                                              | 10-120 $\mu\text{mol/g}$ catalyst $\text{NO}_x$ (1-12 $\mu\text{M}$ $\text{NO}_x$ )*                                                                                                     | 15 |
| Commercial metallic iron                                                                                                 | 16343 – 406469 $\mu\text{M}$ total N                                                                                                                                                     | 15 |
| $^{15}\text{N}_2$ scrubbing solution                                                                                     | 18.5 $\mu\text{M}$ $^{14}\text{NH}_3$ , 33 $\mu\text{M}$ $^{15}\text{NH}_3$                                                                                                              | 11 |
| Potential induced generation of $\text{NH}_3$ from Fe loaded onto stainless steel                                        | 10 $\mu\text{M}$ $\text{NH}_3$                                                                                                                                                           | 13 |
| Release of $\text{NH}_3$ from Nafion 117 membrane soaked in electrolyte containing 0.1 $\mu\text{g/mL}$ of $\text{NH}_3$ | 17.6 $\mu\text{M}$ $\text{NH}_3$                                                                                                                                                         | 16 |
| Background                                                                                                               | 1.5 $\mu\text{M}$ $\text{NH}_3$                                                                                                                                                          | 17 |
| Background                                                                                                               | 2 $\mu\text{M}$ $\text{NO}_x$                                                                                                                                                            | 13 |
| Background                                                                                                               | 0.5 $\mu\text{M}$ $\text{NH}_3$                                                                                                                                                          | 7  |

## Literature summary of experimental parameters used during aqueous nitrogen electroreduction experiments

Table S3. Literature summary of experimental parameters used during aqueous NRR studies.

| Ref | Gas flow rate (mL/min) | Electrolyte volume (mL) | Electrode Area ( $\text{cm}^2$ ) | Electrolysis time (h) | $^{15}\text{N}$ ? [a] | QT? [b] | Flow rate $^{15}\text{N}$ (ml/min) | Electrolysis time $^{15}\text{N}$ (h) |
|-----|------------------------|-------------------------|----------------------------------|-----------------------|-----------------------|---------|------------------------------------|---------------------------------------|
| 18  | n.a.                   | n.a.                    | 1                                | 2                     | yes                   | no      | n.a.                               | 10                                    |
| 19  | 0.48                   | 100                     | n.a.                             | 2                     | yes                   | no      | 0.48                               | 2                                     |
| 20  | 250                    | n.a.                    | 6.25                             | 1                     | yes                   | no      | 5                                  | 1                                     |
| 21  | n.a.                   | 30                      | 1                                | n.a.                  | yes                   | no      | n.a.                               | 2                                     |
| 22  | n.a.                   | 30                      | 1                                | 2                     | no                    | no      | n.a.                               | n.a.                                  |
| 23  | n.a.                   | 90                      | 2                                | 6                     | yes                   | no      | 20 mL every 10 min                 | 6                                     |
| 24  | no flow?               | 30                      | 2                                | 2                     | yes                   | no      | n.a.                               | 2                                     |
| 25  | 20                     | n.a.                    | n.a.                             | 2                     | yes                   | no      | n.a.                               | n.a.                                  |
| 26  | n.a.                   | 50                      | 1                                | 2                     | yes                   | no      | n.a.                               | 2                                     |
| 27  | n.a.                   | n.a.                    | 1                                | n.a.                  | no                    | no      | n.a.                               | n.a.                                  |
| 28  | n.a.                   | n.a.                    | 1.5                              | n.a.                  | no                    | no      | n.a.                               | n.a.                                  |
| 29  | n.a.                   | 30                      | 1                                | 2                     | yes                   | yes     | n.a.                               | 10                                    |
| 30  | n.a.                   | n.a.                    | 1                                | 2                     | no                    | no      | n.a.                               | n.a.                                  |
| 31  | n.a.                   | 35                      | 1                                | 2                     | no                    | no      | n.a.                               | n.a.                                  |
| 32  | n.a.                   | 25                      | 1                                | n.a.                  | yes                   | no      | 20 mL every 10 min                 | 6                                     |
| 33  | 10                     | 30                      | 0.07                             | 3                     | yes                   | no      | n.a.                               | n.a.                                  |

|               |    |    |      |      |     |     |        |     |
|---------------|----|----|------|------|-----|-----|--------|-----|
| <sup>34</sup> | 60 | 10 | n.a. | n.a. | yes | yes | static | 0.5 |
| $\bar{x}$     | 40 | 30 | 1    | 2    |     |     |        |     |

[a] <sup>15</sup>N?: Were control experiments with <sup>15</sup>N performed?  
[b] QT?: Was a quantitative agreement between <sup>14</sup>NH<sub>3</sub> and <sup>15</sup>NH<sub>3</sub> data demonstrated?

## References

- (1) Battino, R.; Rettich, T. R.; Tominaga, T. The Solubility of Nitrogen and Air in Liquids. *Journal of Physical and Chemical Reference Data* **1984**, *13* (2), 563–600. <https://doi.org/10.1063/1.555713>.
- (2) Ferrell, R. T.; Himmelblau, D. M. Diffusion Coefficients of Nitrogen and Oxygen in Water. **1967**, *12* (1), 5. <https://doi.org/10.1021/je60032a036>.
- (3) Carroll, J. J.; Slupsky, J. D.; Mather, A. E. The Solubility of Carbon Dioxide in Water at Low Pressure. *Journal of Physical and Chemical Reference Data* **1991**, *20* (6), 1201–1209. <https://doi.org/10.1063/1.555900>.
- (4) Jähne, B.; Heinz, G.; Dietrich, W. Measurement of the Diffusion Coefficients of Sparingly Soluble Gases in Water. *Journal of Geophysical Research* **1987**, *92* (C10), 10767. <https://doi.org/10.1029/JC092iC10p10767>.
- (5) Clark, E. L.; Resasco, J.; Landers, A.; Lin, J.; Chung, L.-T.; Walton, A.; Hahn, C.; Jaramillo, T. F.; Bell, A. T. Standards and Protocols for Data Acquisition and Reporting for Studies of the Electrochemical Reduction of Carbon Dioxide. *ACS Catalysis* **2018**, *8* (7), 6560–6570. <https://doi.org/10.1021/acscatal.8b01340>.
- (6) Bard, A. J.; Faulkner, L. R. In *Electrochemical methods: fundamentals and applications*; Wiley: New York, 2001; p 96.
- (7) Andersen, S. Z.; Čolić, V.; Yang, S.; Schwalbe, J. A.; Nielander, A. C.; McEnaney, J. M.; Enemark-Rasmussen, K.; Baker, J. G.; Singh, A. R.; Rohr, B. A.; Statt, M. J.; Blair, S. J.; Mezzavilla, S.; Kibsgaard, J.; Vesborg, P. C. K.; Cargnello, M.; Bent, S. F.; Jaramillo, T. F.; Stephens, I. E. L.; Nørskov, J. K.; Chorkendorff, I. A Rigorous Electrochemical Ammonia Synthesis Protocol with Quantitative Isotope Measurements. *Nature* **2019**, *570* (7762), 504–508. <https://doi.org/10.1038/s41586-019-1260-x>.
- (8) Larson, T. V.; Covert, D. S.; Frank, R.; Charlson, R. J. Ammonia in the Human Airways: Neutralization of Inspired Acid Sulfate Aerosols. *Science* **1977**, *197* (4299), 161–163. <https://doi.org/10.1126/science.877545>.
- (9) Duan, G. Y.; Ren, Y.; Tang, Y.; Sun, Y. Z.; Chen, Y. M.; Wan, P. Y.; Yang, X. J. Improving the Reliability and Accuracy of Ammonia Quantification in Electro- and Photochemical Synthesis. *ChemSusChem* **2020**, *13* (1), 88–96. <https://doi.org/10.1002/cssc.201901623>.
- (10) Saigne, C.; Kirchner, S.; Legrand, M. ION-CHROMATOGRAPHIC MEASUREMENTS OF AMMONIUM, FLUORIDE, ACETATE, FORMATE AND METHANESULPHONATE IONS AT VERY LOW LEVELS IN ANTARCTIC ICE. *Analytica Chimica Acta*, **1987**, *203*, 11–21.
- (11) Yu, W.; Buabthong, P.; Read, C. G.; Dalleska, N. F.; Lewis, N. S.; Lewerenz, H.-J.; Gray, H. B.; Brinkert, K. Cathodic NH<sub>4</sub><sup>+</sup> Leaching of Nitrogen Impurities in CoMo Thin-Film Electrodes in Aqueous Acidic Solutions. *Sustainable Energy & Fuels* **2020**, *4* (10), 5080–5087. <https://doi.org/10.1039/D0SE00674B>.
- (12) Boucher, D. L.; Davies, J. A.; Edwards, J. G.; Mennad, A. An Investigation of the Putative Photosynthesis of Ammonia on Iron-Doped Titania and Other Metal Oxides. *Journal of Photochemistry and Photobiology A: Chemistry* **1995**, *88* (1), 53–64. [https://doi.org/10.1016/1010-6030\(94\)03994-6](https://doi.org/10.1016/1010-6030(94)03994-6).
- (13) Hodgetts, R.; Du, H.-L.; MacFarlane, D. R.; Simonov, A. N. Electrochemically Induced Generation of Extraneous Nitrite and Ammonia in Organic Electrolyte Solutions during Nitrogen Reduction

- Experiments. *ChemElectroChem* **2021**, *8* (9), 1596–1604. <https://doi.org/10.1002/celec.202100251>.
- (14) Dabundo, R.; Lehmann, M. F.; Treibergs, L.; Tobias, C. R.; Altabet, M. A.; Moisaner, P. H.; Granger, J. The Contamination of Commercial  $^{15}\text{N}_2$  Gas Stocks with  $^{15}\text{N}$ -Labeled Nitrate and Ammonium and Consequences for Nitrogen Fixation Measurements. *PLoS ONE* **2014**, *9* (10), e110335. <https://doi.org/10.1371/journal.pone.0110335>.
- (15) Chen, Y.; Liu, H.; Ha, N.; Licht, S.; Gu, S.; Li, W. Revealing Nitrogen-Containing Species in Commercial Catalysts Used for Ammonia Electrosynthesis. *Nat Catal* **2020**, *3* (12), 1055–1061. <https://doi.org/10.1038/s41929-020-00527-4>.
- (16) Ren, Y.; Yu, C.; Tan, X.; Han, X.; Huang, H.; Huang, H.; Qiu, J. Is It Appropriate to Use the Nafion Membrane in Electrocatalytic  $\text{N}_2$  Reduction? *Small Methods* **2019**, *3* (12), 1900474. <https://doi.org/10.1002/smt.201900474>.
- (17) Yu, W.; Lewis, N. S.; Gray, H. B.; Dalleska, N. F. Isotopically Selective Quantification by UPLC-MS of Aqueous Ammonia at Submicromolar Concentrations Using Dansyl Chloride Derivatization. *ACS Energy Letters* **2020**, *5* (5), 1532–1536. <https://doi.org/10.1021/acsenerylett.0c00496>.
- (18) Zhao, L.; Liu, X.; Zhang, S.; Zhao, J.; Xu, X.; Du, Y.; Sun, X.; Zhang, N.; Zhang, Y.; Ren, X.; Wei, Q. Rational Design of Bimetallic  $\text{Rh}_{0.6}\text{Ru}_{0.4}$  Nanoalloys for Enhanced Nitrogen Reduction Electrocatalysis under Mild Conditions. *Journal of Materials Chemistry A* **2021**, *9* (1), 259–263. <https://doi.org/10.1039/D0TA09099A>.
- (19) Wei, X.; Vogel, D.; Keller, L.; Kriescher, S.; Wessling, M. Microtubular Gas Diffusion Electrode Based on Ruthenium-Carbon Nanotubes for Ambient Electrochemical Nitrogen Reduction to Ammonia. *ChemElectroChem* **2020**, *7* (22), 4679–4684. <https://doi.org/10.1002/celec.202001370>.
- (20) Kim, M.-C.; Nam, H.; Choi, J.; Kim, H. S.; Lee, H. W.; Kim, D.; Kong, J.; Han, S. S.; Lee, S. Y.; Park, H. S. Hydrogen Bonding-Mediated Enhancement of Bioinspired Electrochemical Nitrogen Reduction on  $\text{Cu}_{2-x}\text{S}$  Catalysts. *ACS Catalysis* **2020**, *10* (18), 10577–10584. <https://doi.org/10.1021/acscatal.0c01730>.
- (21) Jin, Y.; Ding, X.; Zhang, L.; Cong, M.; Xu, F.; Wei, Y.; Hao, S.; Gao, Y. Boosting Electrocatalytic Reduction of Nitrogen to Ammonia under Ambient Conditions by Alloy Engineering. *Chemical Communications* **2020**, *56* (77), 11477–11480. <https://doi.org/10.1039/D0CC02489A>.
- (22) Jiang, X.; He, M.; Tang, M.; Zheng, Q.; Xu, C.; Lin, D. Nanostructured Bimetallic Ni-Fe Phosphide Nanoplates as an Electrocatalyst for Efficient  $\text{N}_2$  Fixation under Ambient Conditions. *J Mater Sci* **2020**, *55* (31), 15252–15262. <https://doi.org/10.1007/s10853-020-05085-5>.
- (23) Lin, Y.-X.; Zhang, S.-N.; Xue, Z.-H.; Zhang, J.-J.; Su, H.; Zhao, T.-J.; Zhai, G.-Y.; Li, X.-H.; Antonietti, M.; Chen, J.-S. Boosting Selective Nitrogen Reduction to Ammonia on Electron-Deficient Copper Nanoparticles. *Nat Commun* **2019**, *10* (1), 4380. <https://doi.org/10.1038/s41467-019-12312-4>.
- (24) Zhang, L.; Cong, M.; Ding, X.; Jin, Y.; Xu, F.; Wang, Y.; Chen, L.; Zhang, L. A Janus Fe-SnO<sub>2</sub> Catalyst That Enables Bifunctional Electrochemical Nitrogen Fixation. *Angew. Chem. Int. Ed.* **2020**, *59* (27), 10888–10893. <https://doi.org/10.1002/anie.202003518>.
- (25) Li, Y.; Chen, J.; Cai, P.; Wen, Z. An Electrochemically Neutralized Energy-Assisted Low-Cost Acid-Alkaline Electrolyzer for Energy-Saving Electrolysis Hydrogen Generation. *Journal of Materials Chemistry A* **2018**, *6* (12), 4948–4954. <https://doi.org/10.1039/C7TA10374C>.
- (26) Zhao, S.; Liu, H.; Qiu, Y.; Liu, S.; Diao, J.; Chang, C.; Si, R.; Guo, X. An Oxygen Vacancy-Rich Two-Dimensional Au/TiO<sub>2</sub> Hybrid for Synergistically Enhanced Electrochemical  $\text{N}_2$  Activation and Reduction. *J. Mater. Chem. A* **2020**, *8* (14), 6586–6596. <https://doi.org/10.1039/D0TA00658K>.
- (27) Wang, J.; Ren, Y.; Chen, M.; Cao, G.; Chen, Z.; Wang, P. Bismuth Hollow Nanospheres for Efficient Electrosynthesis of Ammonia under Ambient Conditions. *Journal of Alloys and Compounds* **2020**, *830*, 154668. <https://doi.org/10.1016/j.jallcom.2020.154668>.
- (28) Tong, Y.; Guo, H.; Liu, D.; Yan, X.; Su, P.; Liang, J.; Zhou, S.; Liu, J.; Lu, G. Q. (Max); Dou, S. X. Vacancy Engineering of Iron-Doped  $\text{W}_{18}\text{O}_{49}$  Nanoreactors for Low-Barrier Electrochemical



- Nitrogen Reduction. *Angew. Chem. Int. Ed.* **2020**, *59* (19), 7356–7361. <https://doi.org/10.1002/anie.202002029>.
- (29) Wang, J.; Huang, B.; Ji, Y.; Sun, M.; Wu, T.; Yin, R.; Zhu, X.; Li, Y.; Shao, Q.; Huang, X. A General Strategy to Glassy M-Te (M = Ru, Rh, Ir) Porous Nanorods for Efficient Electrochemical N<sub>2</sub> Fixation. *Adv. Mater.* **2020**, *32* (11), 1907112. <https://doi.org/10.1002/adma.201907112>.
- (30) Wang, F.; Lv, X.; Zhu, X.; Du, J.; Lu, S.; Alshehri, A. A.; Alzahrani, K. A.; Zheng, B.; Sun, X. Bi Nanodendrites for Efficient Electrocatalytic N<sub>2</sub> Fixation to NH<sub>3</sub> under Ambient Conditions. *Chem. Commun.* **2020**, *56* (14), 2107–2110. <https://doi.org/10.1039/C9CC09803H>.
- (31) Ohrelius, M.; Guo, H.; Xian, H.; Yu, G.; Alshehri, A. A.; Alzahrani, K. A.; Li, T.; Andersson, M. Electrochemical Synthesis of Ammonia Based on a Perovskite LaCrO<sub>3</sub> Catalyst. *ChemCatChem* **2020**, *12* (3), 731–735. <https://doi.org/10.1002/cctc.201901818>.
- (32) Xue, Z.-H.; Zhang, S.-N.; Lin, Y.-X.; Su, H.; Zhai, G.-Y.; Han, J.-T.; Yu, Q.-Y.; Li, X.-H.; Antonietti, M.; Chen, J.-S. Electrochemical Reduction of N<sub>2</sub> into NH<sub>3</sub> by Donor–Acceptor Couples of Ni and Au Nanoparticles with a 67.8% Faradaic Efficiency. *J. Am. Chem. Soc.* **2019**, *141* (38), 14976–14980. <https://doi.org/10.1021/jacs.9b07963>.
- (33) Song, P.; Wang, H.; Kang, L.; Ran, B.; Song, H.; Wang, R. Electrochemical Nitrogen Reduction to Ammonia at Ambient Conditions on Nitrogen and Phosphorus Co-Doped Porous Carbon. *Chem. Commun.* **2019**, *55* (5), 687–690. <https://doi.org/10.1039/C8CC09256G>.
- (34) Suryanto, B. H. R.; Wang, D.; Azofra, L. M.; Harb, M.; Cavallo, L.; Mitchell, D. R. G.; Chatti, M.; MacFarlane, D. R. MoS<sub>2</sub> Polymorphic Engineering Enhances Selectivity in the Electrochemical Reduction of Nitrogen to Ammonia. *ACS Energy Letters* **2019**, *4* (2), 430–435. <https://doi.org/10.1021/acsenergylett.8b02257>.
